# Supplementary material for: An efficient and robust exfoliated bentonite/Ag3PO4/AgBr plasmonic photocatalyst for degradation of parabens
Source: Royal Society of Chemistry journal article supplement (doi:10.1039/d0ra02455d), 2020-01-01
Supplement: d0ra02455d1.pdf [file d0ra02455d1.pdf]

Supporting information

## An efficient and robust exfoliated bentonite/Ag<sub>3</sub>PO<sub>4</sub>/AgBr plasmonic photocatalyst for degradation of parabens

Jianchao Ma<sup>a</sup>, Shurong Yang<sup>a</sup>, Huixian Shi<sup>b,\*</sup>, Jin Pang<sup>a</sup>, Xiaopeng Zhang<sup>a</sup>, Yuxing Wang<sup>a</sup>, Hongqi Sun<sup>c,\*</sup>

<sup>a</sup>College of Mining Engineering, Taiyuan University of Technology, Taiyuan 030024, Shanxi, P.R. China

<sup>b</sup>Institute of New Carbon Materials, Taiyuan University of Technology, Taiyuan 030024, Shanxi, P.R. China

<sup>c</sup>School of Engineering, Edith Cowan University, Joondalup, Western Australia, 6027, Australia

\*Corresponding authors.

E-mail: [shihuixian@tyut.edu.cn](mailto:shihuixian@tyut.edu.cn) (H. Shi), [h.sun@ecu.edu.au](mailto:h.sun@ecu.edu.au) (H. Sun)

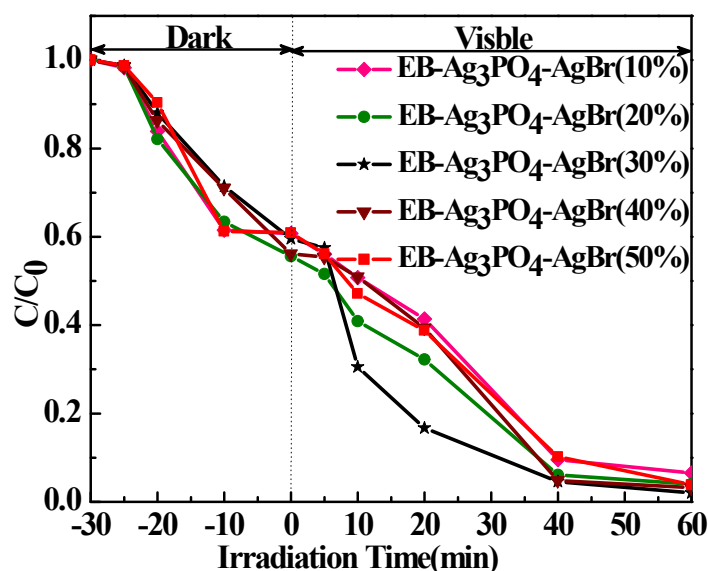

Fig. S1. The effect of the ratio of AgBr to Ag<sub>3</sub>PO<sub>4</sub> in different mass ratio on the degradation of MPB.

Table S1. Textural properties of the samples

|                                          |                         |                                  |                      |
|------------------------------------------|-------------------------|----------------------------------|----------------------|
| Exfoliated-bentonite                     | 16.3595                 | 0.022304                         | 43.185               |
| Name                                     | BET/(m <sup>2</sup> /g) | Pore volume/(cm <sup>3</sup> /g) | Average aperture/(Å) |
| EB/Ag <sub>3</sub> PO <sub>4</sub>       | 4.5035                  | 0.029572                         | 47.788               |
| EB/Ag <sub>3</sub> PO <sub>4</sub> /AgBr | 13.2130                 | 0.057100                         | 100.378              |

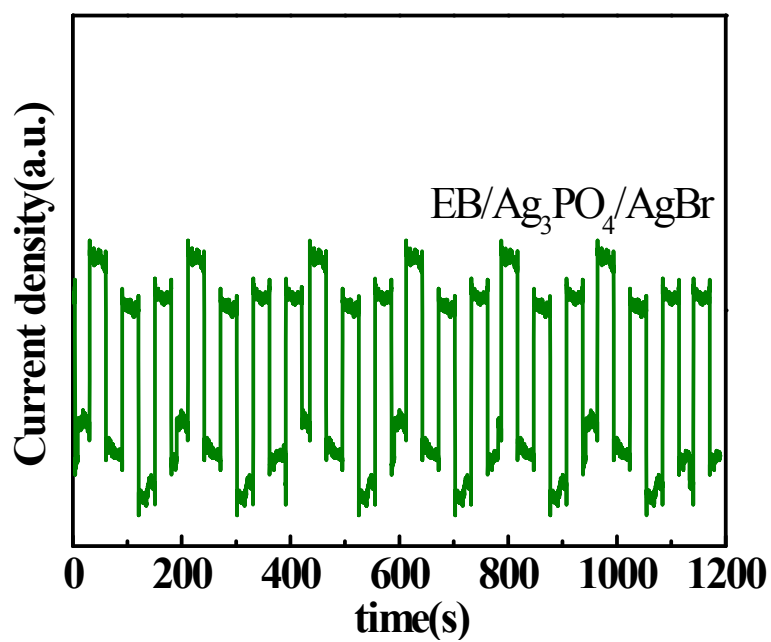

Fig. S2. Transient photocurrent response for the EB/Ag<sub>3</sub>PO<sub>4</sub>/AgBr (30%) hybrids under visible light irradiation;

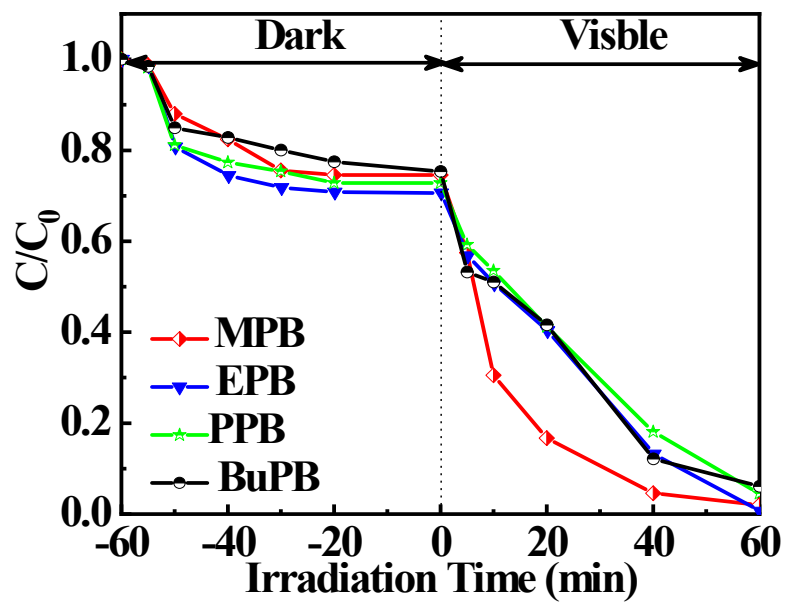

Fig. S3 Relationship curves between irradiation time and  $C/C_0$  for MBP, EPB, PPB and BuPB on EB/Ag<sub>3</sub>PO<sub>4</sub>/AgBr (30%) composites.

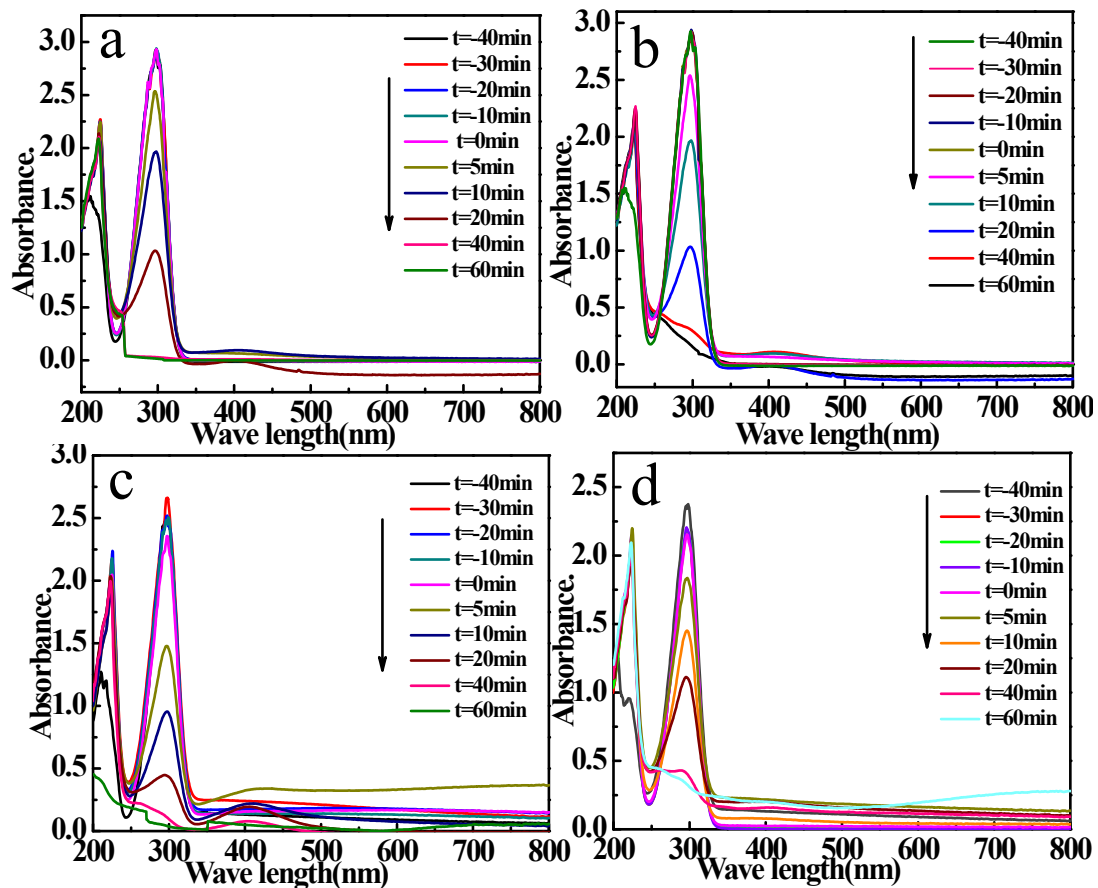

Fig. S4. UV-vis spectra changes of (a) MPB, (b) EPB, (c) PPB, (d) BuPB solution during the photocatalytic degradation by the as-prepared photocatalyst in visible light illumination

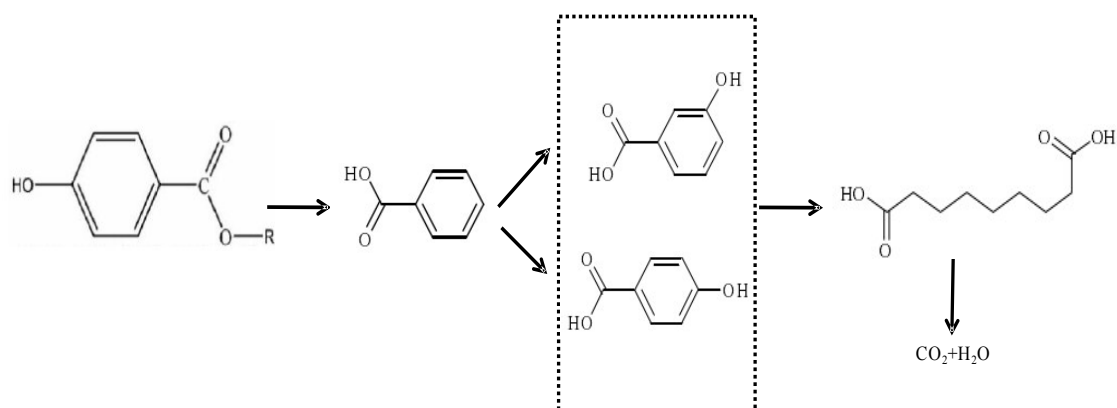

Fig. S5. Photodegradation pathways of methylparaben
